# Supplementary material for: Repetitive Sequence Distribution on Saguinus, Leontocebus and Leontopithecus Tamarins (Platyrrhine, Primates) by Mapping Telomeric (TTAGGG) Motifs and rDNA Loci
Source: MDPI journal article supplement (doi:10.3390/biology10090844), 2021-08-30

# *Saguinus oedipus*

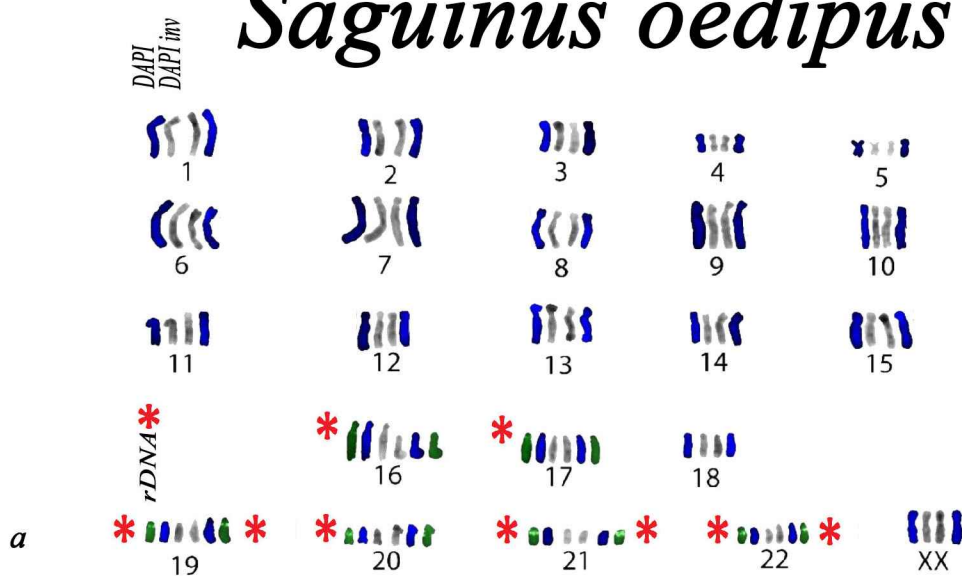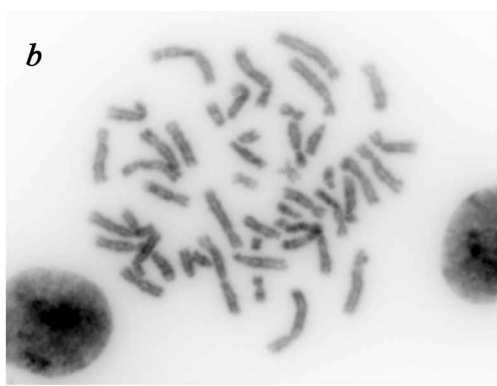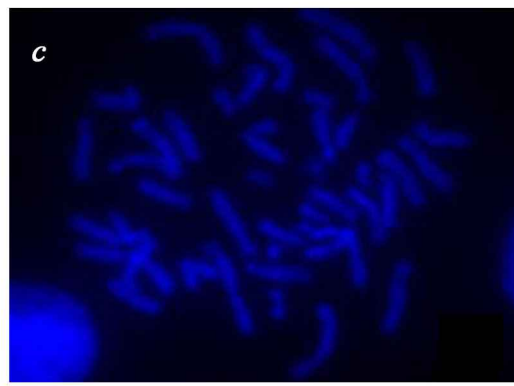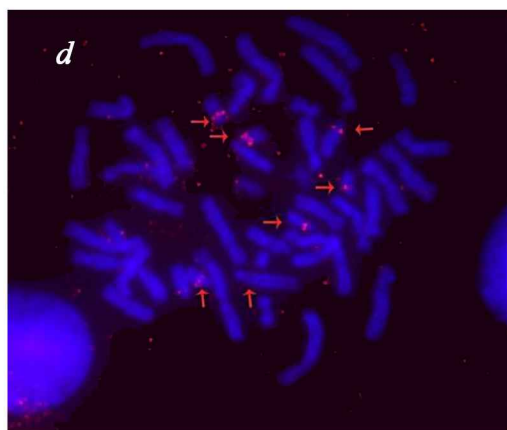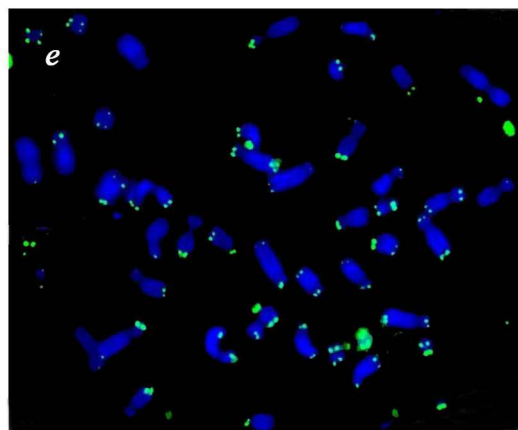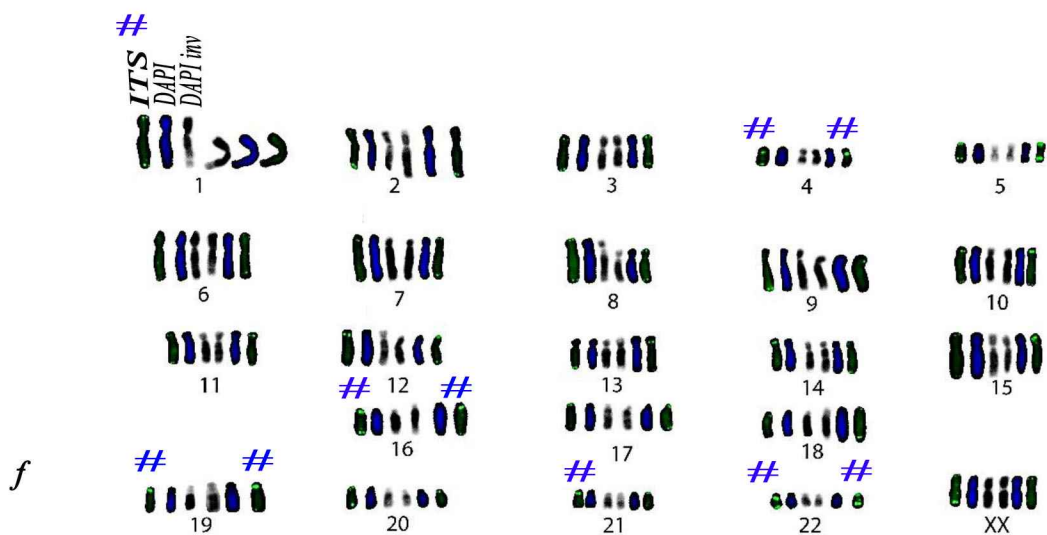

# *Saguinus geoffroyi*

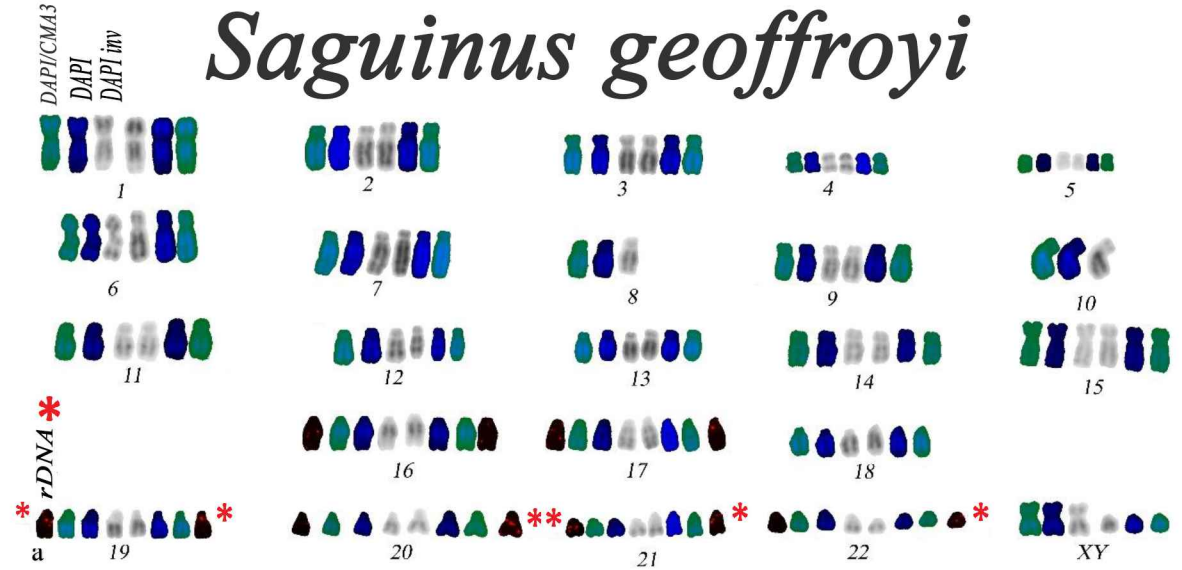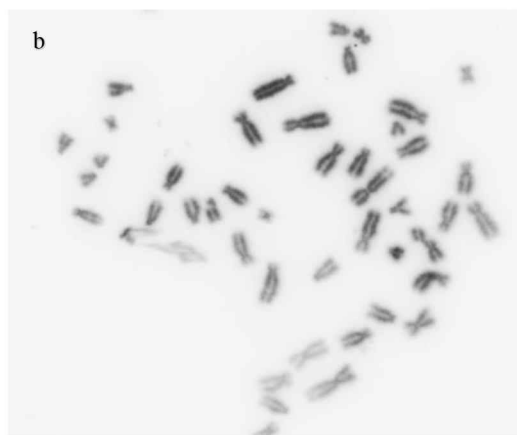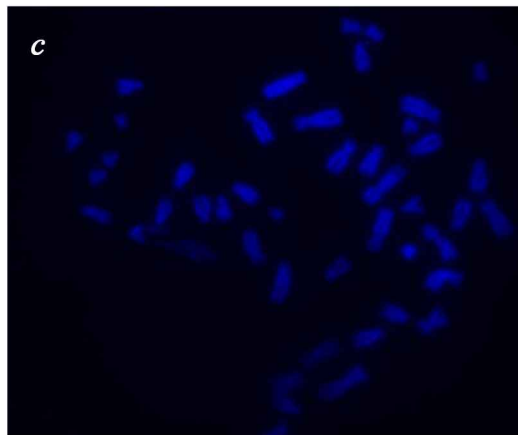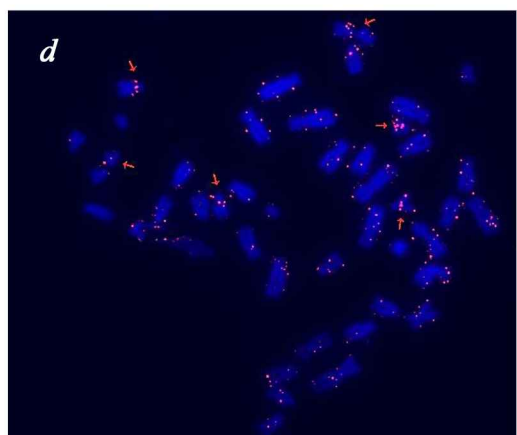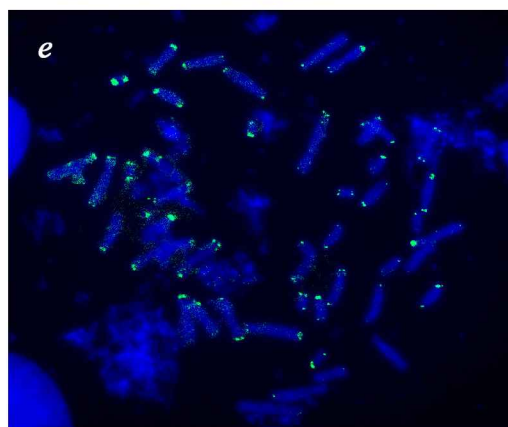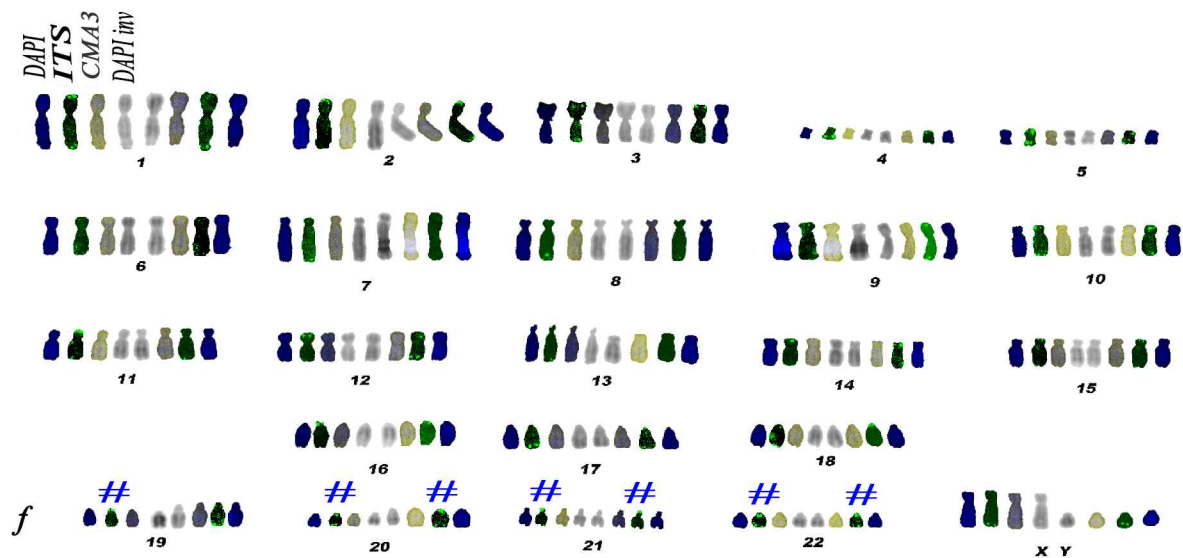

# *Leontopithecus rosalia*

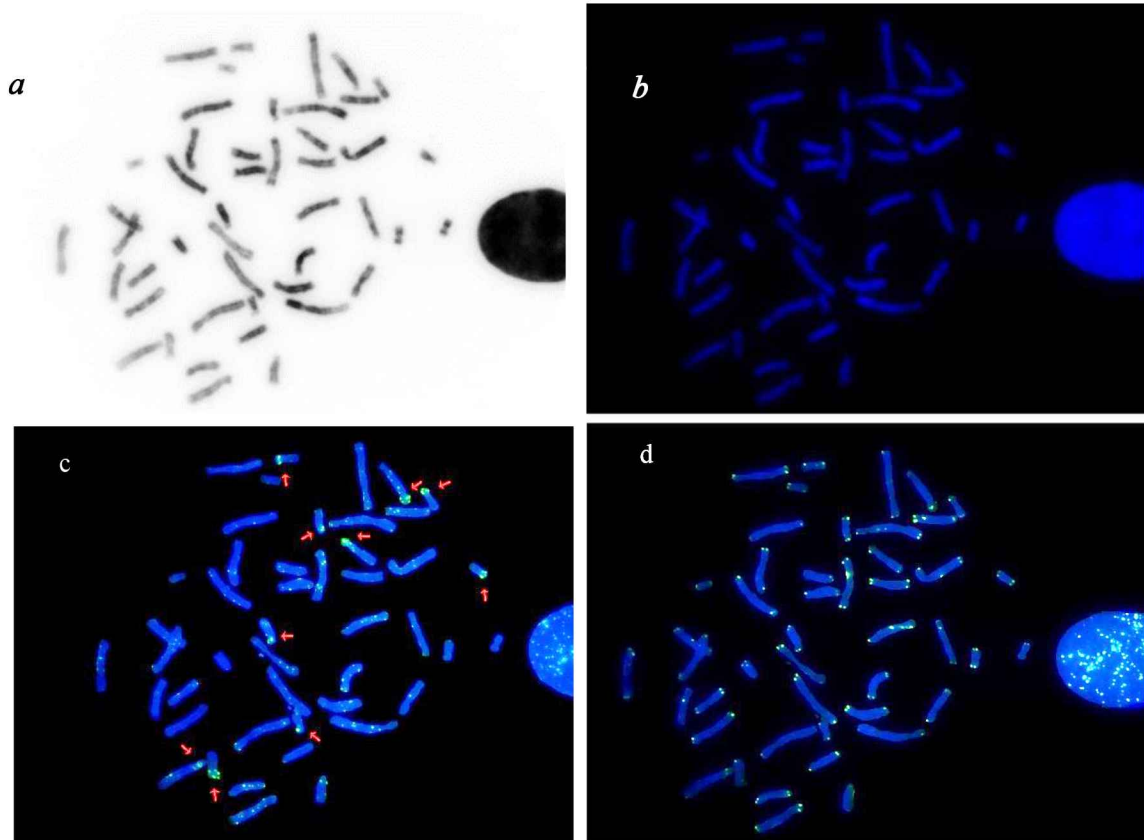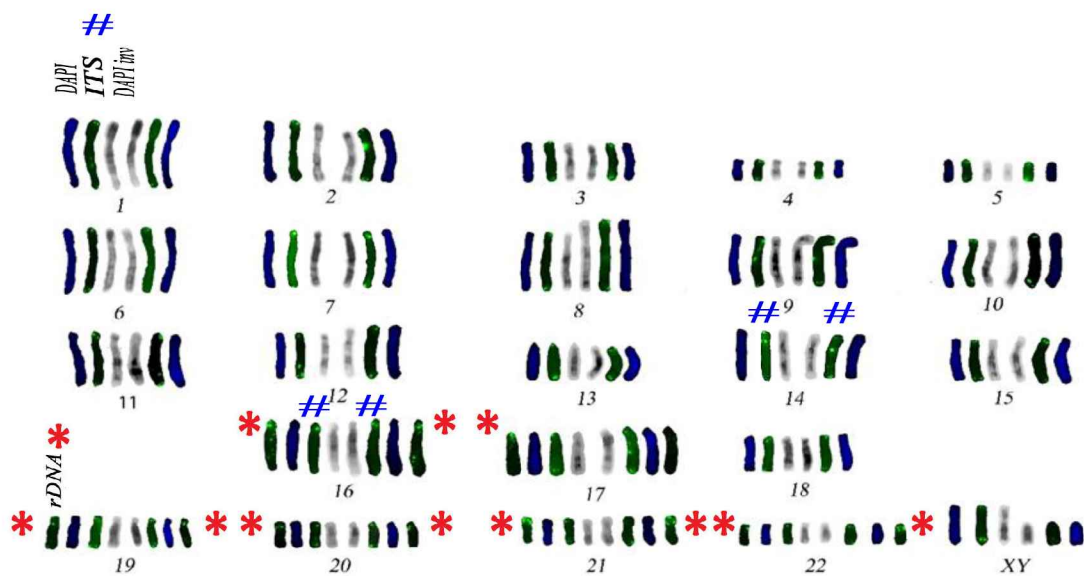

# *Saguinus mystax*

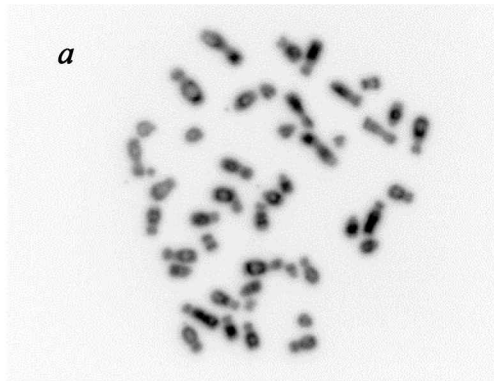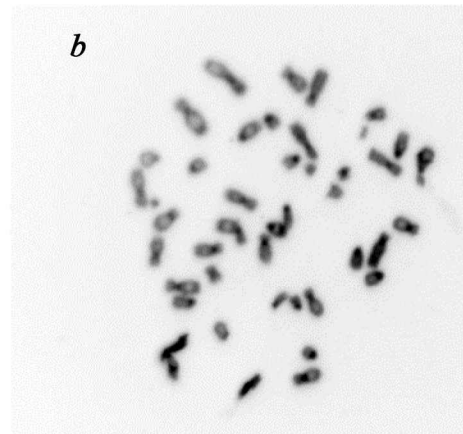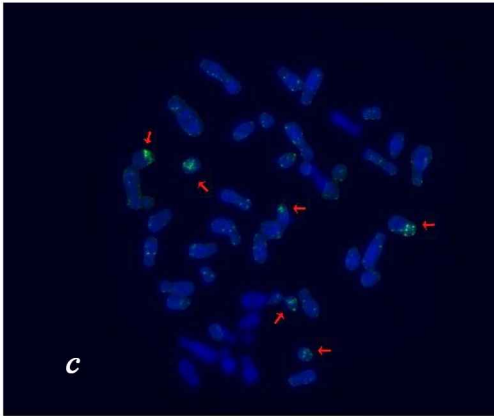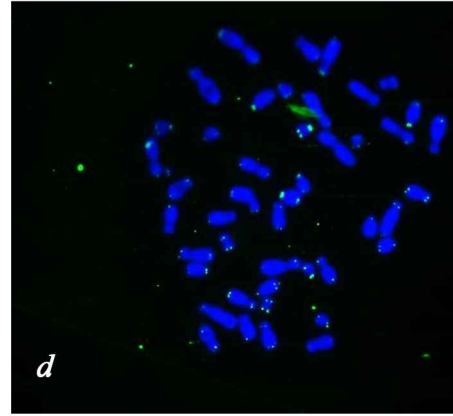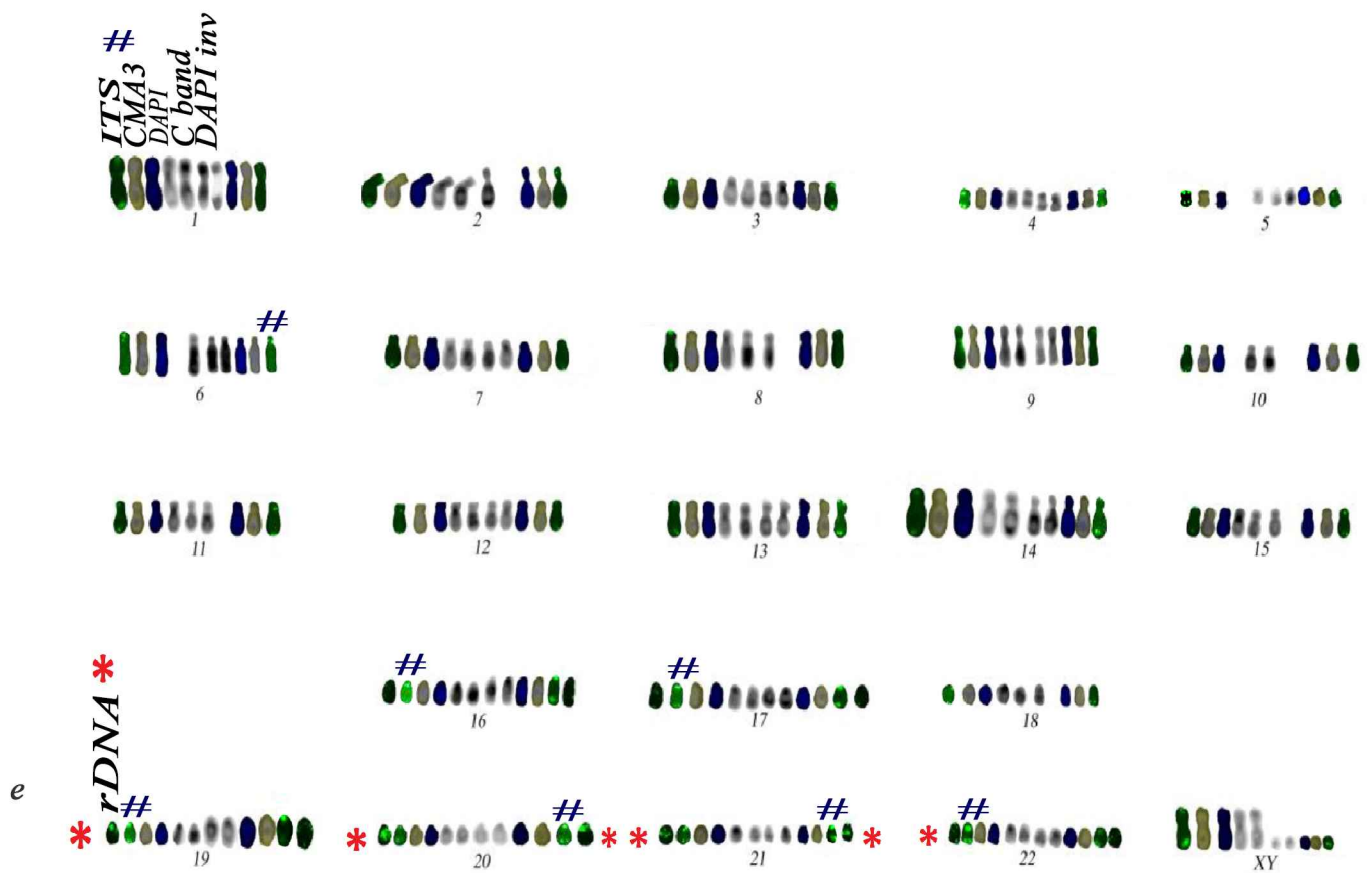

# Leontocebus fuscicollis

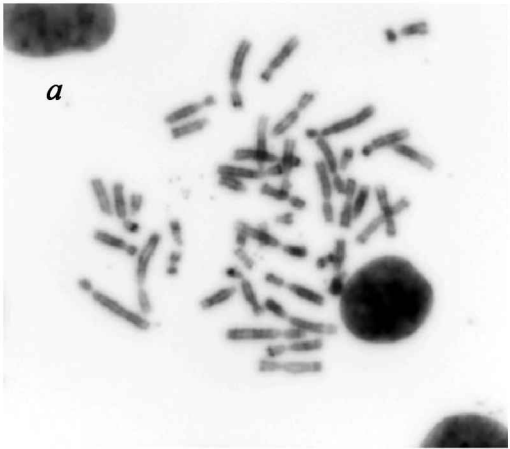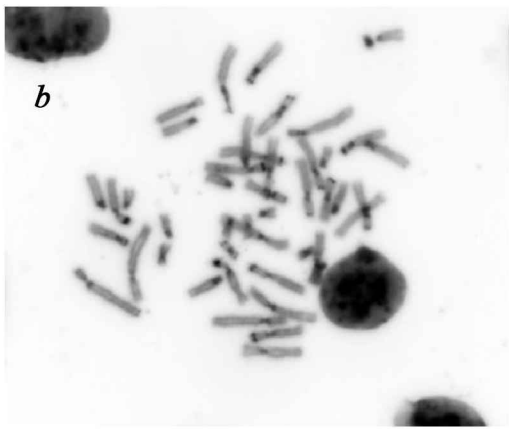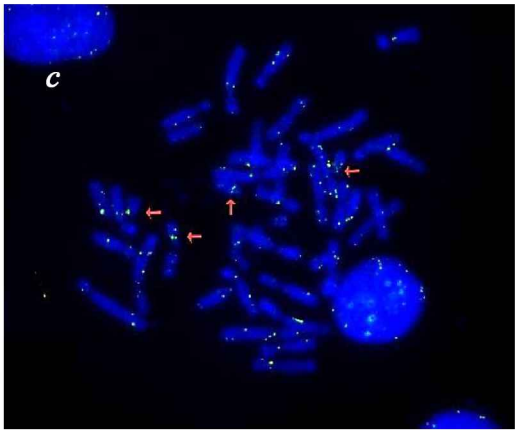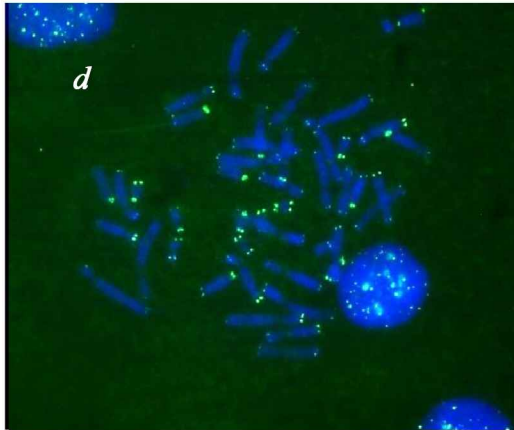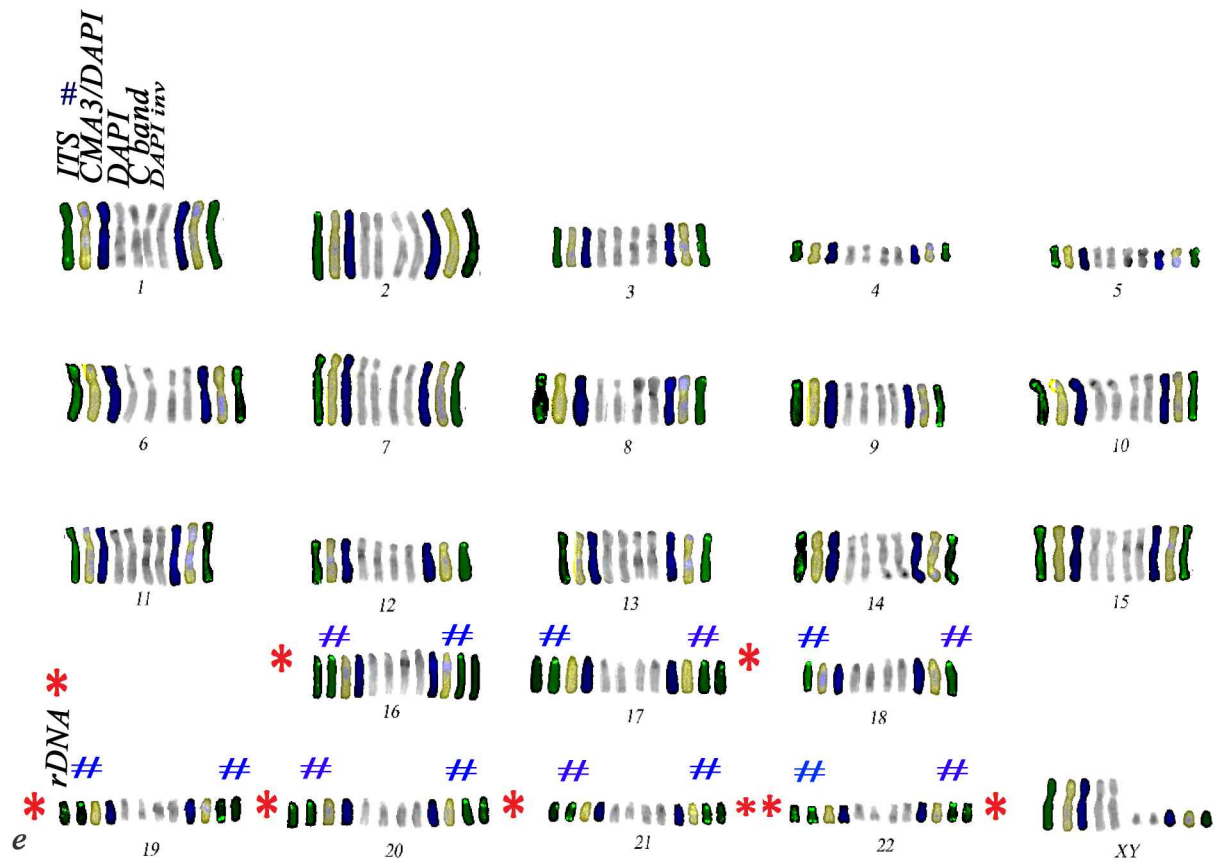

Supplement: s1 [file s1]
